# Supplementary material for: The Role of IL-9 Polymorphisms and Serum IL-9 Levels in Carcinogenesis and Survival Rate for Laryngeal Squamous Cell Carcinoma
Source: PubMed Central journal article supplement (PMC8001846; doi:10.3390/cells10030601), 2021-03-09
Supplement: cells-10-00601-s001.pdf [file cells-10-00601-s001.pdf]

**SUPPLEMENTARY MATERIAL**

**Table S1.** Binomial logistic regression analysis of *IL-9*: rs1859430, rs2069870, rs11741137, rs2069885, rs2069884 in healthy control and patients with LSCC groups.

| <b>Model</b>                  | <b>Genotype/allele</b> | <b>OR<sup>1</sup> (95% CI<sup>2</sup>)</b> | <b><i>p</i>- Value<sup>3</sup></b> | <b>AIC<sup>4</sup></b> |
|-------------------------------|------------------------|--------------------------------------------|------------------------------------|------------------------|
| <b><i>IL-9</i> rs1859430</b>  |                        |                                            |                                    |                        |
| Codominant                    | G/A vs. A/A            | 0.889 (0.655-1.208)                        | 0.452                              | 1092.101               |
|                               | G/G vs. A/A            | 1.040 (0.554-1.950)                        | 0.903                              |                        |
| Dominant                      | G/A+G/G vs. A/A        | 0.909 (0.679-1.217)                        | 0.522                              | 1090.321               |
| Recessive                     | G/G vs. A/A+G/A        | 1.083 (0.583-2.014)                        | 0.800                              | 1090.669               |
| Overdominant                  | G/A vs. A/A+G/G        | 0.886 (0.655-1.199)                        | 0.433                              | 1090.116               |
| Additive                      | G                      | 0.949 (0.748-1.205)                        | 0.669                              | 1090.549               |
| <b><i>IL-9</i> rs2069870</b>  |                        |                                            |                                    |                        |
| Codominant                    | A/G vs. G/G            | 0.892 (0.665-1.195)                        | 0.443                              | 1092.141               |
|                               | A/A vs. G/G            |                                            |                                    |                        |
| Dominant                      | A/G+A/A vs. G/G        | 0.892 (0.665-1.195)                        | 0.443                              | 1090.141               |
| Recessive                     | A/A vs. G/G+A/G        | -                                          | -                                  | -                      |
| Overdominant                  | A/G vs. G/G+A/A        | 0.892 (0.665-1.195)                        | 0.443                              | 1090.141               |
| Additive                      | A                      | 0.892 (0.665-1.195)                        | 0.443                              | 1090.141               |
| <b><i>IL-9</i> rs11741137</b> |                        |                                            |                                    |                        |
| Codominant                    | C/T vs. C/C            | 0.894 (0.651-1.228)                        | 0.490                              | 1091.826               |
|                               | T/T vs. C/C            | 1.300 (0.539-3.137)                        | 0.559                              |                        |
| Dominant                      | C/T+T/T vs. C/C        | 0.923 (0.679-1.255)                        | 0.609                              | 1090.471               |
| Recessive                     | T/T vs. C/C+C/T        | 1.343 (0.559-3.225)                        | 0.510                              | 1090.305               |
| Overdominant                  | C/T vs. C/C+T/T        | 0.886 (0.646-1.215)                        | 0.452                              | 1090.163               |
| Additive                      | T                      | 0.965 (0.736-1.266)                        | 0.800                              | 1090.668               |
| <b><i>IL-9</i> rs2069885</b>  |                        |                                            |                                    |                        |
| Codominant                    | G/A vs. A/A            | 0.867 (0.629-1.194)                        | 0.383                              | 1091.268               |
|                               | G/G vs. A/A            | 1.410 (0.575-3.457)                        | 0.453                              |                        |
| Dominant                      | G/A+G/G vs. A/A        | 0.903 (0.663-1.231)                        | 0.518                              | 1090.314               |
| Recessive                     | G/G vs. A/A+G/A        | 1.468 (0.601-3.583)                        | 0.399                              | 1090.035               |
| Overdominant                  | G/A vs. A/A+G/G        | 0.857 (0.623-1.178)                        | 0.342                              | 1089.822               |
| Additive                      | G                      | 0.956 (0.727-1.257)                        | 0.747                              | 1090.628               |
| <b><i>IL-9</i> rs2069884</b>  |                        |                                            |                                    |                        |
| Codominant                    | T/G vs. G/G            | 0.867 (0.629-1.194)                        | 0.383                              | 1091.268               |
|                               | T/T vs. G/G            | 1.410 (0.575-3.457)                        | 0.453                              |                        |
| Dominant                      | T/G+T/T vs. G/G        | 0.903 (0.663-1.231)                        | 0.518                              | 1090.314               |
| Recessive                     | T/T vs. G/G+T/G        | 1.468 (0.601-3.583)                        | 0.399                              | 1090.035               |
| Overdominant                  | T/G vs. G/G+T/T        | 0.857 (0.623-1.178)                        | 0.342                              | 1089.822               |
| Additive                      | T                      | 0.956 (0.727-1.257)                        | 0.747                              | 1090.628               |

<sup>1</sup>OR: odds ratio; <sup>2</sup>CI: confidence interval; <sup>3</sup>*p*-Value: significance level *p*<0.05; <sup>4</sup>AIC: Akaike information criterion.

**Table S2.** Frequencies of *IL-9*: rs1859430, rs2069870, rs11741137, rs2069885, and rs2069884 in the control group and patients with LSCC early stage and advanced stage subgroups.

| Gene                   | Genotype / Allele | Control group n (%), (n=533) | Early-stage of LSCC <sup>1</sup> subgroup (I + II) (%), n=169 | p-Value | Advanced stage (III + IV) (proc.), n=131 | p-Value | p-Value <sup>2*</sup> |
|------------------------|-------------------|------------------------------|---------------------------------------------------------------|---------|------------------------------------------|---------|-----------------------|
| <i>IL-9</i> rs1859430  | G/G               | 322 (60.4)                   | 113 (66.9)                                                    | 0.168   | 75 (57.3)                                | 0.701   |                       |
|                        | A/G               | 183 (34.3)                   | 45 (26.6)                                                     |         | 50 (38.2)                                |         |                       |
|                        | A/A               | 28 (5.3)                     | 11 (6.5)                                                      |         | 6 (4.6)                                  |         |                       |
|                        | <b>Total</b>      | 533 (100)                    | 169 (100)                                                     |         | 131 (100)                                |         |                       |
|                        | <b>Allele</b>     |                              |                                                               |         |                                          |         |                       |
|                        | G                 | 827 (77.6)                   | 271 (80.2)                                                    |         | 200 (76.3)                               |         |                       |
| A                      | 239 (22.4)        | 67 (19.8)                    | 62 (23.7)                                                     |         |                                          |         |                       |
| <i>IL-9</i> rs2069870  | A/A               | 325 (61.0)                   | 113 (66.9)                                                    | 0.169   | 78 (59.5)                                | 0.763   |                       |
|                        | A/G               | 208 (39.0)                   | 56 (33.1)                                                     |         | 53 (40.5)                                |         |                       |
|                        | G/G               | -                            | -                                                             |         | -                                        |         |                       |
|                        | <b>Total</b>      | 533 (100)                    | 169 (100)                                                     |         | 131 (100)                                |         |                       |
|                        | <b>Allele</b>     |                              |                                                               |         |                                          |         |                       |
|                        | A                 | 858 (80.5)                   | 282 (83.4)                                                    |         | 209 (79.8)                               |         |                       |
| G                      | 208 (19.5)        | 56 (16.6)                    | 53 (20.2)                                                     |         |                                          |         |                       |
| <i>IL-9</i> rs11741137 | C/C               | 364 (68.3)                   | 123 (72.8)                                                    | 0.253   | 87 (66.4)                                | 0.916   |                       |
|                        | C/T               | 157 (29.5)                   | 40 (23.7)                                                     |         | 41 (31.3)                                |         |                       |
|                        | T/T               | 12 (2.3)                     | 6 (3.6)                                                       |         | 3 (2.3)                                  |         |                       |
|                        | <b>Total</b>      | 533 (100)                    | 169 (100)                                                     |         | 131 (100)                                |         |                       |
|                        | <b>Allele</b>     |                              |                                                               |         |                                          |         |                       |
|                        | C                 | 885 (83.0)                   | 286 (84.6)                                                    |         | 215 (82.1)                               |         |                       |
| T                      | 181 (17.)         | 52 (15.4)                    | 47 (17.9)                                                     |         |                                          |         |                       |
| <i>IL-9</i> rs2069885  | G/G               | 367 (68.9)                   | 123 (72.8)                                                    | 0.246   | 90 (68.7)                                | 0.987   |                       |
|                        | G/A               | 155 (29.1)                   | 40 (23.7)                                                     |         | 38 (29.0)                                |         |                       |
|                        | A/A               | 11 (2.1)                     | 6 (3.6)                                                       |         | 3 (2.3)                                  |         |                       |
|                        | <b>Total</b>      | 533 (100)                    | 169 (100)                                                     |         | 131 (100)                                |         |                       |
|                        | <b>Allele</b>     |                              |                                                               |         |                                          |         |                       |
|                        | G                 | 889 (83.4)                   | 286 (84.6)                                                    |         | 218 (83.2)                               |         |                       |
| A                      | 177 (16.6)        | 52 (15.4)                    | 44 (16.8)                                                     |         |                                          |         |                       |
| <i>IL-9</i> rs2069884  | G/G               | 367 (68.9)                   | 123 (72.8)                                                    | 0.246   | 90 (68.7)                                | 0.987   |                       |
|                        | G/T               | 155 (29.1)                   | 40 (23.7)                                                     |         | 38 (29.0)                                |         |                       |
|                        | T/T               | 11 (2.1)                     | 6 (3.6)                                                       |         | 3 (2.3)                                  |         |                       |
|                        | <b>Total</b>      | 533 (100)                    | 169 (100)                                                     |         | 131 (100)                                |         |                       |
|                        | <b>Allele</b>     |                              |                                                               |         |                                          |         |                       |
|                        | G                 | 889 (83.4)                   | 286 (84.6)                                                    |         | 218 (83.2)                               |         |                       |
| T                      | 177 (16.6)        | 52 (15.4)                    | 44 (16.8)                                                     |         |                                          |         |                       |

<sup>1</sup>LSCC: Laryngeal squamous cell carcinoma; <sup>2</sup>p-Value: significance level  $p < 0.05$ ; \*Early stage *vs.* advanced stage.

**Table 3.** Frequencies of *IL-9* rs1859430, rs2069870, rs11741137, rs2069885, and rs2069884 genotypes and alleles in the control group and LSCC patients with no metastasis and with metastasis to the neck lymph nodes subgroups.

| Gene                  | Genotype / Allele | Control group (proc.), n=533 | No metastasis to the neck lymph nodes (%), n=242 | p-Value <sup>1</sup> | Metastasis to the neck lymph nodes (%), n=58 | p-Value <sup>1</sup> | p-Value <sup>1,*</sup> |
|-----------------------|-------------------|------------------------------|--------------------------------------------------|----------------------|----------------------------------------------|----------------------|------------------------|
| <i>IL-9</i> rs1859430 | G/G               | 322 (60.4)                   | 157 (64.9)                                       | 0.487                | 31 (53.4)                                    | 0.431                |                        |

|                        |               |            |            |       |           |       |
|------------------------|---------------|------------|------------|-------|-----------|-------|
|                        | <b>A/G</b>    | 183 (34.3) | 73 (30.2)  |       | 22 (37.9) |       |
|                        | <b>A/A</b>    | 28 (5.3)   | 12 (5.0)   |       | 5 (8.6)   |       |
|                        | <b>Total</b>  | 533 (100)  | 242 (100)  |       | 58 (100)  |       |
|                        | <b>Allele</b> |            |            |       |           |       |
|                        | <b>G</b>      | 827 (77.6) | 387 (80.0) |       | 84 (72.4) |       |
|                        | <b>A</b>      | 239 (22.4) | 97 (20.)   |       | 32 (27.6) |       |
| <i>IL-9 rs2069870</i>  | <b>A/A</b>    | 325 (61.0) | 155 (64.0) | 0.414 | 36 (62.1) | 0.871 |
|                        | <b>A/G</b>    | 208 (39.0) | 87 (36.0)  |       | 22 (37.9) |       |
|                        | <b>G/G</b>    | -          | -          |       | -         |       |
|                        | <b>Total</b>  | 533 (100)  | 242 (100)  |       | 58 (100)  |       |
|                        | <b>Allele</b> |            |            |       |           |       |
|                        | <b>A</b>      | 858 (80.5) | 397 (82.0) |       | 94 (81.0) |       |
|                        | <b>G</b>      | 208 (19.5) | 87 (18.0)  |       | 21 (19.0) |       |
| <i>IL-9 rs11741137</i> | <b>C/C</b>    | 364 (68.3) | 172 (71.1) | 0.562 | 38 (65.5) | 0.811 |
|                        | <b>C/T</b>    | 157 (29.5) | 63 (26.0)  |       | 18 (31.0) |       |
|                        | <b>T/T</b>    | 12 (2.3)   | 7 (2.9)    |       | 2 (3.4)   |       |
|                        | <b>Total</b>  | 533 (100)  | 242 (100)  |       | 58 (100)  |       |
|                        | <b>Allele</b> |            |            |       |           |       |
|                        | <b>C</b>      | 885 (83.0) | 407 (84.1) |       | 94 (81.0) |       |
|                        | <b>T</b>      | 181 (17.0) | 77 (15.9)  |       | 22 (19.0) |       |
| <i>IL-9 rs2069885</i>  | <b>G/G</b>    | 367 (68.9) | 173 (71.5) | 0.504 | 40 (69.0) | 0.780 |
|                        | <b>G/A</b>    | 155 (29.1) | 62 (25.6)  |       | 16 (27.6) |       |
|                        | <b>A/A</b>    | 11 (2.1)   | 7 (2.9)    |       | 2 (3.4)   |       |
|                        | <b>Total</b>  | 533 (100)  | 242 (100)  |       | 58 (100)  |       |
|                        | <b>Allele</b> |            |            |       |           |       |
|                        | <b>G</b>      | 889 (83.4) | 408 (84.3) |       | 96 (82.8) |       |
|                        | <b>A</b>      | 177 (16.6) | 76 (15.7)  |       | 20 (17.2) |       |
| <i>IL-9 rs2069884</i>  | <b>G/G</b>    | 367 (68.9) | 173 (71.5) | 0.504 | 40 (69.0) | 0.780 |
|                        | <b>G/T</b>    | 155 (29.1) | 62 (25.6)  |       | 16 (27.6) |       |
|                        | <b>T/T</b>    | 11 (2.1)   | 7 (2.9)    |       | 2 (3.4)   |       |
|                        | <b>Total</b>  | 533 (100)  | 242 (100)  |       | 58 (100)  |       |
|                        | <b>Allele</b> |            |            |       |           |       |
|                        | <b>G</b>      | 889 (83.4) | 408 (84.3) |       | 96 (82.8) |       |
|                        | <b>T</b>      | 177 (16.6) | 76 (15.7)  |       | 20 (17.2) |       |

<sup>1</sup>p-Value: significance level  $p < 0.05$ ; \*No metastasis to neck lymph nodes vs. metastasis to neck lymph nodes.
